# Supplementary material for: Chromosomal anomalies at 1q, 3, 16q, and mutations of SIX1 and DROSHA genes underlie Wilms tumor recurrences
Source: PubMed Central journal article supplement (PMC4891013; doi:10.18632/oncotarget.6950), 2016-01-20
Supplement: oncotarget-07-8908-s001.pdf [file oncotarget-07-8908-s001.pdf]

## Chromosomal anomalies at 1q, 3, 16q, and mutations of *SIX1* and *DROSHA* genes underlie Wilms tumor recurrences

### Supplementary Materials

### *SIX1*

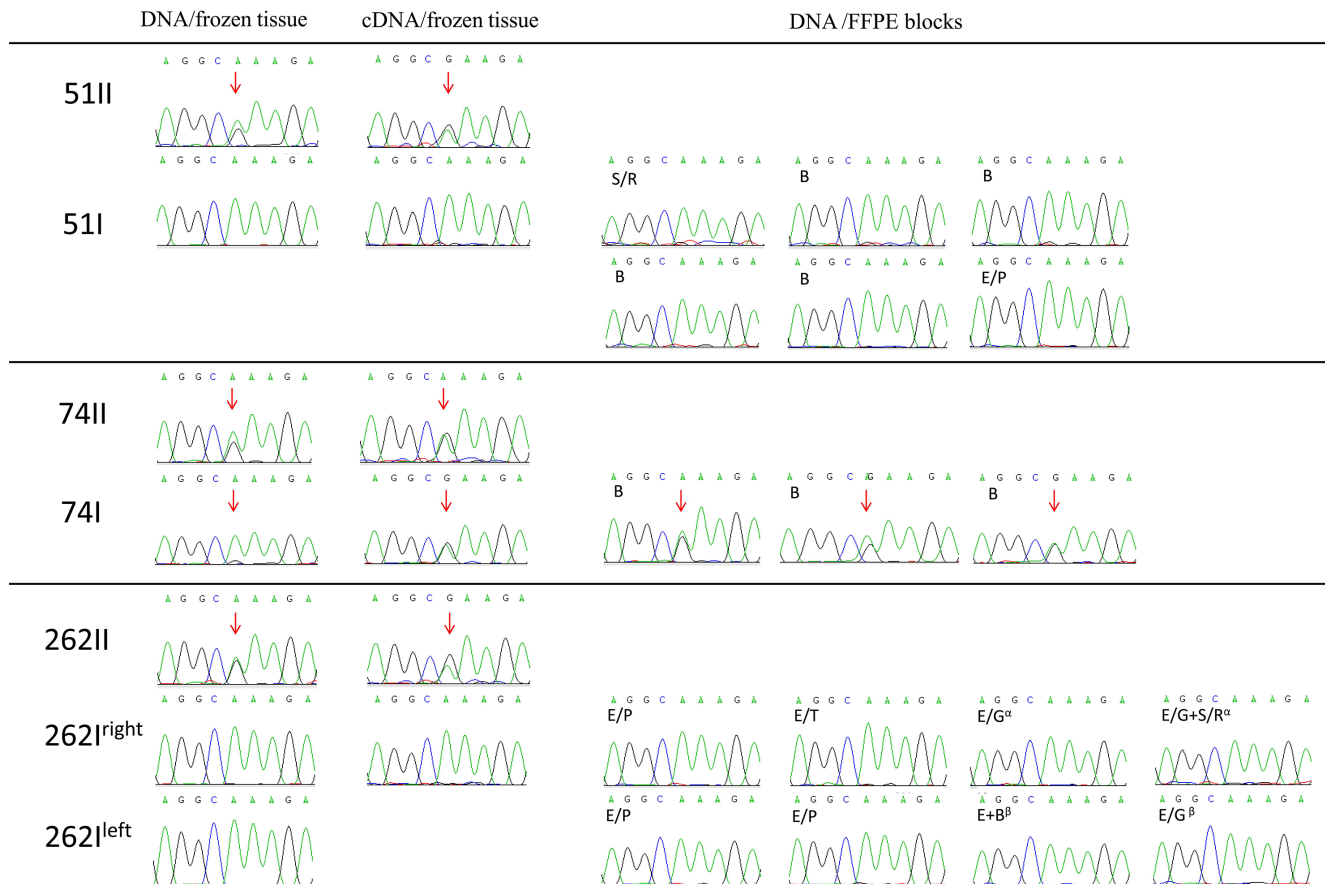

**Supplementary Figure S1: *SIX1* mutation screening.** Sanger sequencing of genomic DNA and cDNA from frozen primary (I) and recurrent (II) tumor tissue and of DNA obtained from FFPE primary tumor (I) material. The red arrow indicate the c.530A>G mutation. Histology of FFPE material used for DNA extraction is indicated. S/R, stromal component with rhabdomyoblastic differentiation; B, blastemal component; E/P, epithelial component with papillary features; E/T, epithelial component with tubular structures; E/G, epithelial component with glomerular structures;  $\alpha$ , different histological components macro dissected from the same FFPE block;  $\beta$ , different histological components macro dissected from the same FFPE block.

# DROSHA

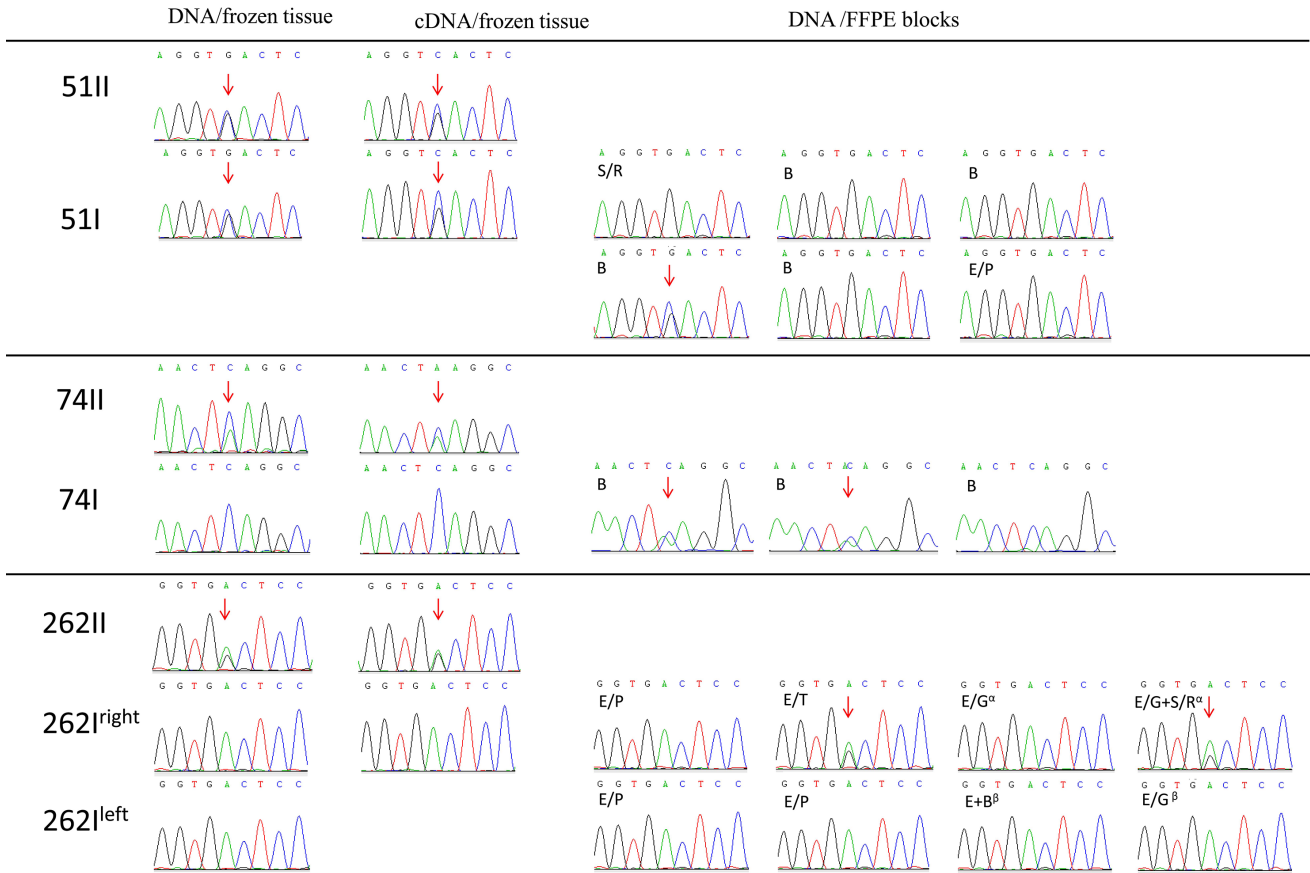

**Supplementary Figure S2: DROSHA mutation screening.** Sanger sequencing of genomic DNA and cDNA from frozen primary (I) and recurrent (II) tumor tissue and of DNA obtained from FFPE primary tumor (I) material. The red arrow indicate the identified mutations. Histology of FFPE material used for DNA extraction is indicated. S/R, stromal component with rhabdomyoblastic differentiation; B, blastemal component; E/P, epithelial component with papillary features; E/T, epithelial component with tubular structures; E/G, epithelial component with glomerular structures;  $\alpha$ , different histological components macro dissected from the same FFPE block;  $\beta$ , different histological components macro dissected from the same FFPE block.

**Supplementary Table S1: De novo events in recurrences**

| Chromosome region             | Cytoband        | Event             | Recurrence no. |
|-------------------------------|-----------------|-------------------|----------------|
| chr1:142,649,580-247,249,719  | q21.1-q44       | Allelic imbalance | 51, 74, 262    |
| chr2:86,965,048-88,101,382    | p11.2 (*)       | Allelic imbalance | 51, 113        |
| chr3:0-80,020,965             | p26.3-p12.3     | Allelic imbalance | 111, 113       |
| chr3:81,229,116-89,189,181    | p12.3-p11.2     | Allelic imbalance | 111, 113       |
| chr3:94,994,003-155,910,888   | q11.2-q25.2     | Allelic imbalance | 111, 113       |
| chr3:163,998,933-164,105,429  | q26.1(*)        | CN loss           | 30, 36         |
| chr3:163,998,933-164,105,429  | q26.1(*)        | LOH               | 30, 74         |
| chr6:26,560,982-27,337,036    | p22.1           | Allelic imbalance | 51, 111        |
| chr6:29,686,696-30,168,096    | p22.1-p21.33    | Allelic imbalance | 74, 111        |
| chr6:29,958,544-30,007,366    | p21.33(*)       | CN loss           | 111, 262       |
| chr6:32,561,814-32,659,589    | p21.32(*)       | Allelic imbalance | 30, 111        |
| chr6:32,643,909-32,659,589    | p21.32(*)       | CN loss           | 30, 74         |
| chr6:147,612,730-148,896,357  | q24.3           | Allelic imbalance | 36, 111        |
| chr7:5,032,254-5,059,656      | p22.1           | CN loss           | 30, 74         |
| chr7:61,060,840-62,434,687    | q11.1-q11.21(*) | Allelic imbalance | 36, 111        |
| chr8:42,314,267-43,951,038    | p11.21-p11.1    | Allelic imbalance | 111, 113       |
| chr8:46,994,719-49,190,162    | q11.1-q11.21    | Allelic imbalance | 111, 113       |
| chr8:103,282,575-103,389,406  | q22.3           | Allelic imbalance | 36, 113        |
| chr9:38,932,768-40,907,166    | p13.1-p12(*)    | Allelic imbalance | 51, 111        |
| chr9:66,194,869-68,225,875    | q12(*)          | Allelic imbalance | 51, 111        |
| chr10:0-9,873,294             | p15.3-p14       | CN loss           | 51, 74         |
| chr10:0-9,873,294             | p15.3-p14       | LOH               | 51, 74         |
| chr11:83,482,872-84,421,016   | q14.1           | CN loss           | 39, 111        |
| chr11:89,562,803-89,587,477   | q14.3           | CN loss           | 39, 111        |
| chr11:100,774,878-130,569,344 | q22.1-q25       | CN loss           | 39, 111        |
| chr16:44,943,958-88,827,254   | q11.2-q24.3     | Allelic imbalance | 36, 262        |
| chr16:44,943,958-68,540,340   | q11.2-q22.1     | CN loss           | 74, 262        |
| chr16:69,720,459-82,457,535   | q22.2-q23.3     | CN loss           | 74, 262        |
| chr17:0-19,672,268            | p13.3-p11.2     | Allelic imbalance | 113, 262       |
| chr20:27,100,000-28,255,585   | q11.1(*)        | Allelic imbalance | 51, 111        |
| chr21:9,730,102-10,201,835    | p11.2-p11.1(*)  | Allelic imbalance | 51, 74         |

De novo events in recurrences: chromosomal regions, cytoband locations and samples involved in the chromosomal events are indicated. Chromosomes X and Y were excluded; (\*) indicates a chromosomal region with a percentage of CNV overlap > 80%.

**Supplementary Table S2: Shared events in recurrences**

| Chromosome region            | Cytoband         | Event             | Recurrence no.           |
|------------------------------|------------------|-------------------|--------------------------|
| chr1:142,649,580-146,391,799 | q21.1(*)         | Allelic imbalance | 30, 36, 39, 51, 74, 262  |
| chr1:146,391,799-147,955,187 | q21.1(*)         | Allelic imbalance | 36, 51, 74, 262          |
| chr1:147,955,187-148,190,820 | q21.1-q21.2(*)   | Allelic imbalance | 36, 39, 51, 74, 262      |
| chr1:148,190,820-204,669,053 | q21.2-q32.1      | Allelic imbalance | 30, 36, 39, 51, 74, 262  |
| chr1:148,190,820-204,669,053 | q21.2-q32.1      | CN gain           | 30, 39, 51               |
| chr1:204,669,053-247,249,719 | q32.1-q44        | Allelic imbalance | 30, 36, 51, 74, 262      |
| chr2:82,371,324-83,157,679   | p12(*)           | LOH               | 36, 74, 111              |
| chr2:90,970,848-91,680,834   | p11.2-p11.1(*)   | Allelic imbalance | 30, 39, 113              |
| chr3:0-19,337,019            | p26.3-p24.3      | Allelic imbalance | 39, 111, 113             |
| chr3:20,395,567-80,020,965   | p24.3-p12.3      | Allelic imbalance | 39, 111, 113             |
| chr3:81,229,116-89,189,181   | p12.3-p11.2      | Allelic imbalance | 39, 111, 113             |
| chr3:94,994,003-155,910,888  | q11.2-q25.2      | Allelic imbalance | 39, 111, 113             |
| chr5:68,915,847-68,935,325   | q13.2(*)         | LOH               | 30, 36, 51, 113          |
| chr5: 68,935,325-69,079,058  | q13.2(*)         | LOH               | 30, 36, 39, 51, 113      |
| chr5: 69,079,058-69,699,316  | q13.2(*)         | LOH               | 30, 36, 39, 51, 113, 262 |
| chr5: 69,699,316-70,071,849  | q13.2(*)         | LOH               | 30, 36, 39, 113, 262     |
| chr5: 70,071,849-70,098,885  | q13.2(*)         | LOH               | 30, 36, 39, 262          |
| chr5: 70,098,885-70,238,992  | q13.2(*)         | LOH               | 30, 36, 262              |
| chr6:29,958,544-30,017,518   | p21.33(*)        | Allelic imbalance | 74, 111, 262             |
| chr6:32,639,473-32,659,589   | p21.32(*)        | Allelic imbalance | 30, 36, 111              |
| chr6:32,643,909-32,659,589   | p21.32(*)        | CN loss           | 30, 36, 74               |
| chr7:61,540,598-63,683,558   | q11.21(*)        | Allelic imbalance | 30, 36, 111              |
| chr7:110,319,308-110,842,066 | q31.1(*)         | Allelic imbalance | 30, 36, 51               |
| chr8:39,353,808-39,503,466   | p11.23-p11.22(*) | HCL               | 51, 74, 111, 113, 262    |
| chr8:39,353,808-39,503,466   | p11.23-p11.22(*) | LOH/TAL           | 39, 51, 74, 111          |
| chr8:42,314,267-43,951,038   | p11.21-p11.1     | Allelic imbalance | 30, 111, 113             |
| chr8:46,994,719-49,190,162   | q11.1-q11.21     | Allelic imbalance | 30, 111, 113             |
| chr8:50,157,278-51,041,715   | q11.21-q11.22    | LOH               | 39, 51, 113              |
| chr8:103,282,575-103,389,406 | q22.3            | Allelic imbalance | 30, 36, 113              |
| chr9:43,515,795-46,336,803   | p11.2(*)         | Allelic imbalance | 30, 36, 39, 51           |
| chr11:99,103,230-101,101,789 | q22.1            | LOH               | 39, 74, 111              |
| chr13:88,157,194-88,767,293  | q31.2            | LOH               | 39, 113, 262             |
| chr16:44,943,958-68,540,340  | q11.2-q22.1      | CN loss           | 51, 74, 262              |
| chr16:69,720,459-82,457,535  | q22.2-q23.3      | CN loss           | 51, 74, 262              |
| chr17:15,637,203-19,672,268  | p12-p11.2        | Allelic imbalance | 111, 113, 262            |
| chr20:27,100,000-28,255,585  | q11.1(*)         | Allelic imbalance | 36, 51, 111, 113, 262    |
| chr21:9,730,102-10,201,835   | p11.2-p11.1(*)   | Allelic imbalance | 39, 51, 74, 262          |

Shared events in recurrences: chromosomal regions, cytoband locations and samples involved in the chromosomal events are indicated. Chromosomes X and Y were excluded; (\*) indicates a chromosomal region with a percentage of CNV overlap > 80%.

**Supplementary Table S3: Common anomalies between de novo and shared events in recurrences**

| Chromosome region            | Cytoband       | Event             |
|------------------------------|----------------|-------------------|
| chr1:142,649,580-247,249,719 | q21.1-q44      | Allelic imbalance |
| chr3:0-19,337,019            | p26.3-p24.3    | Allelic imbalance |
| chr3:20,395,567-80,020,965   | p24.3-p12.3    | Allelic imbalance |
| chr3:81,229,116-89,189,181   | p12.3-p11.2    | Allelic imbalance |
| chr3:94,994,003-155,910,888  | q11.2-q25.2    | Allelic imbalance |
| chr6:29,958,544-30,017,518   | p21.33(*)      | Allelic imbalance |
| chr6:32,639,473-32,659,589   | p21.32(*)      | Allelic imbalance |
| chr6:32,643,909-32,659,589   | p21.32(*)      | CN loss           |
| chr7:61,540,598-62,434,687   | q11.21(*)      | Allelic imbalance |
| chr8:42,314,267-43,951,038   | p11.21-p11.1   | Allelic imbalance |
| chr8:46,994,719-49,190,162   | q11.1-q11.21   | Allelic imbalance |
| chr8:103,282,575-103,389,406 | q22.3          | Allelic imbalance |
| chr16:44,943,958-68,540,340  | q11.2-q22.1    | CN loss           |
| chr16:69,720,459-82,457,535  | q22.2-q23.3    | CN loss           |
| chr17:15,637,203-19,672,268  | p12-p11.2      | Allelic imbalance |
| chr20:27,100,000-28,255,585  | q11.1(*)       | Allelic imbalance |
| chr21:9,730,102-10,201,835   | p11.2-p11.1(*) | Allelic imbalance |

Anomalies in common between “*de novo*” and “shared” events: chromosomal regions and cytoband locations involved in the common chromosomal events are indicated. (\*) indicates a chromosomal region with a percentage of CNV overlap > 80%.

**Supplementary Table S4: *WT1* primers used for DNA PCR and sequencing**

| Primer  | Sequence                  | Annealing T (°C) |
|---------|---------------------------|------------------|
| WT1 1aF | AGCCAGAGCAGCAGGGAGTC      |                  |
| WT1 1aR | AACGACCCGTAAGCCGAAGC      | 60               |
| WT1 1bF | CGCCGGTGCTGGACTTTG        |                  |
| WT1 1bR | CGGTCAAAGGGGTAGGAGA       | 60               |
| WT1 2F  | CCGTCTTGCAGAGACACC        |                  |
| WT1 2R  | CTAATTTGCTGTGGGTTAGG      | 56               |
| WT1 3F  | GCTCAGGATCTCGTGTCTCC      |                  |
| WT1 3R  | TCCAAGGACCCAGACGCAG       | 60               |
| WT1 4F  | TGTGCAGAGATCAGTGGGATG     |                  |
| WT1 4R  | CAGAGAGCTTTGCCCTTTCTTC    | 60               |
| WT1 5F  | CACTGGATTCTGGGATCTG       |                  |
| WT1 5R  | CTGCATTGCCCCAGGTG         | 60               |
| WT1 6F  | CCAAATGGCGACTGTGAGCC      |                  |
| WT1 6R  | CAGGGCCAAAGAGTCCATC       | 60               |
| WT1 7F  | GACCTACGTGAATGTTACATG     |                  |
| WT1 7R  | CTCTTGAACCATGTTTGCCCAAGAC | 54               |
| WT1 8F  | AGTCCTAGTAGGAGAGGTTGCC    |                  |
| WT1 8R  | CACATGGCTGACTCTCTCATTC    | 60               |
| WT1 9F  | GAAGTCAGCCTTGTGGGC        |                  |
| WT1 9R  | GCCACGCACTATTCCTTCTCTC    | 60               |
| WT1 10F | GAGTGGGTGCCTTGTGATGAC     |                  |
| WT1 10R | TGCCTGGGACACTGAACGG       | 60               |

***WTX* primers used for DNA PCR and sequencing [1]**

| Primer | Sequence                    | Annealing T (°C) |
|--------|-----------------------------|------------------|
| WTX aF | CCAGACCCCACTGTGATGCTTCCTG   |                  |
| WTX aR | CAGCCACAGATGTCTTACATCTGGAGC | 70               |
| WTX bF | CAGCTCCAAGAAAGGTCTCAGCAAG   |                  |
| WTX bR | CTGGATCTTTACAGGCCATTTTCTC   | 65               |
| WTX cF | GTCAGAGCCAGGCTCATGAGCACG    |                  |
| WTX cR | CATCATCATCTGGCAAGGCCATCTC   | 70               |
| WTX dF | GGGATGTGACATCCCTGAAAAGCTTTG |                  |
| WTX dR | CCTCACCTGAATCATCCTCAAATCC   | 65               |
| WTX eF | CAATATGAACCTGGGCTACCATCCCAC |                  |
| WTX eR | CTGGCATGAGCTTCTCGGGCACGTG   | 70               |
| WTX fF | CCTCCATGGTCGAAGCTCTGAGATG   |                  |
| WTX fR | CATAACGCTTCTCCAGAGGACGGAAG  | 70               |
| WTX gF | GAGTATCAGATGAGGCCCTTAGG     |                  |
| WTX gR | CACATCAGCGATGTCAAAGGTCACC   | 65               |
| WTX hF | GGAATGCCACTGTGAGTTTCTCACAGG |                  |
| WTX hR | GTCCTCCTCATCTGAATCTTCCTGC   | 68               |
| WTX iF | GTGAGCAGCCTCCCTCGATACTTGG   |                  |
| WTX iR | ACGAGCTAGTTGAGGCCAGATTC     | 68               |

|        |                            |    |
|--------|----------------------------|----|
| WTX jF | CCAACCAGTTGGACAGGCCTTCCAG  |    |
| WTX jR | CTAGGTTTCCATTCATGGCAGTGGAG | 70 |
| WTX kF | CTTCCAGTTCTGGAGGCTTCAGC    |    |
| WTX kR | GCAGATGCACTTGAGTTGAACGTGG  | 65 |

### ***CTNNB1* primers used for DNA PCR and sequencing**

| Primer    | Sequence                  | Annealing T (°C) |
|-----------|---------------------------|------------------|
| CTNNB1 3F | GCTGATTTGATGGAGTTGGA      |                  |
| CTNNB1 3R | CCAGCTACTTGTCTTGAGTGAA    | 58               |
| CTNNB1 7F | GTTGGTAATATGGCTCTTCTCAGAC |                  |
| CTNNB1 7R | GGCTGCAAACCTGAATAGGACC    | 58               |
| CTNNB1 8F | TAGGATTGATAGGCACTTCTAGC   |                  |
| CTNNB1 8R | AGGAGACCTTCCATCCCTTC      | 58               |

### ***TP53* primers used for DNA PCR and sequencing**

| Primer  | Sequence               | Annealing T (°C) |
|---------|------------------------|------------------|
| TP53 4F | GCTGAGGACCTGGTCCTCTGAC |                  |
| TP53 4R | GAAGAGGAATCCCAAAGTTCCA | 56               |
| TP53 5F | TTTGTCTTCTTGCTGCCGTCTC |                  |
| TP53 5R | AGGCCTGGGGACCCTGGGCA   | 58               |
| TP53 6F | GCTGGTTGCCAGGGTCCCCAG  |                  |
| TP53 6R | CCTGGAGGGCCACTGACAACCA | 63               |
| TP53 7F | CTTGCCACAGGTCTCCCCAA   |                  |
| TP53 7R | GTCAGAGGCAAGCAGAGGCT   | 58               |
| TP53 8F | TTGGGAGTAGATGGAGCCT    |                  |
| TP53 8R | AGGCATAACTGCACCCTTGG   | 58               |
| TP53 9F | GCAGTTATGCCTCAGATTCAC  |                  |
| TP53 9R | AAGACTTAGTACCTGAAGGGT  | 50               |

### ***SIX1* primers used for DNA PCR and sequencing**

| Primer  | Sequence             | Annealing T (°C) |
|---------|----------------------|------------------|
| SIX1 F2 | GCGCACCATCTGGGACGG   | 58               |
| SIX1 R2 | GAGGAGAAAGGACGGCTTCC | [2]              |
| SIX1 F4 | TCCCTACCCATCGCCGCGT  |                  |
| SIX1 R2 | GAGGAGAAAGGACGGCTTCC | [2] FFPE DNA 58  |

### ***SIX1* primers used for cDNA PCR and sequencing**

| Primer  | Sequence               | Annealing T (°C) |
|---------|------------------------|------------------|
| SIX1 F2 | GCGCACCATCTGGGACGG     |                  |
| SIX1 R5 | GCTTGCCCCCTTCCAGAGGAGA | [2] 62           |

### ***SIX2* primers used for DNA PCR and sequencing**

| Primer | Sequence             | Annealing T (°C) |
|--------|----------------------|------------------|
| SIX2F  | CCCGCGAGAAGCGTGAGC   |                  |
| SIX2R  | GGGTCTCCGGCATAGAAAGG | [2] 58           |

**DGCR8 primers used for DNA PCR and sequencing**

| Primer   | Sequence                |     | Annealing T (°C) |
|----------|-------------------------|-----|------------------|
| DGCR8F   | GGGAAATCCGAGGTCTGCAT    | [2] | 58               |
| DGCR8R   | CTTCCCTTTCCTCCCGTTCC    | [2] |                  |
| DGCR8 2F | GCTCTGGTGGTGATGGACAG    |     | 59               |
| DGCR8 2R | GATGCTGCAATCCCAAATCTCTC |     |                  |

**DGCR8 primers used for cDNA PCR and sequencing**

| Primer        | Sequence              |  | Annealing T (°C) |
|---------------|-----------------------|--|------------------|
| DGCR8 2F      | GCTCTGGTGGTGATGGACAG  |  | 59               |
| DGCR8 cDNA 2R | CCTCTGTTCGCCTCTTTTGGG |  |                  |

**DICER1 primers used for DNA PCR and sequencing**

| Primer        | Sequence                 |  | Annealing T (°C) |
|---------------|--------------------------|--|------------------|
| DICER1 cDNA F | CAACTACAGATTCAAGAATAAGGC |  | 58               |
| DICER1 R1     | CCCTGAATATTAAGCATGAACAC  |  |                  |
| DICER1 F2     | GGATTTGGGGATCAGTTGCTATG  |  | 60               |
| DICER1 R2     | CCTGCTGTCCCTTTAGACCAC    |  |                  |
| DICER1 F3     | CTACATCTGTGGACTGCCTG     |  | 58               |
| DICER1 cDNA R | GGATAGTACACCTGCCAGAC     |  |                  |

**DICER1 primers used for cDNA PCR and sequencing**

| Primer        | Sequence                 |  | Annealing T (°C) |
|---------------|--------------------------|--|------------------|
| DICER1 cDNA F | CAACTACAGATTCAAGAATAAGGC |  | 56               |
| DICER1 cDNA R | GGATAGTACACCTGCCAGAC     |  |                  |

**DROSHA primers used for DNA PCR and sequencing**

| Primer     | Sequence                    |          | Annealing T (°C) |
|------------|-----------------------------|----------|------------------|
| DROSHA 23F | CTAAAGGAGCTAACCCATCATGTG    |          | 58               |
| DROSHA 23R | GAAAGCAATGTAATAAGTATGTTACC  |          |                  |
| DROSHA 24F | CACAGACAGAATGTCGTGATGC      |          | 58               |
| DROSHA 24R | CTTATTCAAATGCAAAATTATGCATGG |          |                  |
| DROSHA 29F | CTTAGGGAATTGTATTTGGTTTTGTG  |          | 56               |
| DROSHA 29R | ATATTTGACCCCTCTAATCTTCACTC  |          |                  |
| DROSHA 30F | GTCCAACCCAGGAATAAGAGAG      |          | 58               |
| DROSHA 30R | GAACATAATAATAATGAGGAGGAGGAC |          |                  |
| DROSHA F4  | GGTTATTGATTTCTTTACTTTGATG   |          | 56               |
| DROSHA 29R | ATATTTGACCCCTCTAATCTTCACTC  | FFPE DNA |                  |
| DROSHA 30F | GTCCAACCCAGGAATAAGAGAG      |          | 60               |
| DROSHA R3  | GGCCTCTTGGTCTGTGCTGTTG      | FFPE DNA |                  |

**DROSHA primers used for cDNA PCR and sequencing**

| Primer         | Sequence                 |     | Annealing T (°C) |
|----------------|--------------------------|-----|------------------|
| DROSHA cDNA 1F | GGAGACAGAAAAGTTCATCACATG | [3] | 56               |
| DROSHA cDNA 1R | GATAATTGAGCCAGACTTCGC    | [3] |                  |
| DROSHA cDNA 2F | GCGAAGTCTGGCTCAATTATC    | [3] | 56               |
| DROSHA cDNA 2R | GGGTCATTCCAATCCTGATTC    | [3] |                  |



## REFERENCES

1. Rivera MN, Kim WJ, Wells J, Driscoll DR, Brannigan BW, Han M, Kim JC, Feinberg AP, Gerald WL, Vargas SO, Chin L, Iafrate AJ, Bell DW, et al. An X chromosome gene, WTX, is commonly inactivated in Wilms tumor. *Science*. 2007; 315:642–5.
2. Wegert J, Ishaque N, Vardapour R, Geörg C, Gu Z, Bieg M, Ziegler B, Bausenwein S, Nourkami N, Ludwig N, Keller A, Grimm C, Kneitz S, et al. Mutations in the SIX1/2 pathway and the DROSHA/DGCR8 miRNA microprocessor complex underlie high-risk blastemal type Wilms tumors. *Cancer Cell*. 2015; 27:298–311.
3. Torrezan GT, Ferreira EN, Nakahata AM, Barros BD, Castro MT, Correa BR, Krepischi AC, Olivieri EH, Cunha IW, Tabori U, Grundy PE, Costa CM, de Camargo B, et al. Recurrent somatic mutation in DROSHA induces microRNA profile changes in Wilms tumour. *Nat Commun*. 2014; 5:4039.
